# Supplementary material
Source: PubMed Central journal article supplement (PMC7065593)
Supplement: NIHMS1530687-supplement-1.pdf [file NIHMS1530687-supplement-1.pdf]

1. Supplementary information: Supplementary Discussion about putative cholesterol binding site in hNTSR1, and the amino acid sequence information of the constructs used in NanoBiT G-protein dissociation assay.
