# Supplementary material
Source: PubMed Central journal article supplement (PMC7065593)
Supplement: NIHMS1530687-supplement-2.pdf [file NIHMS1530687-supplement-2.pdf]

## **Supplementary Discussion.**

### **Putative cholesterol observed in both C- and NC-state complex density maps**

In the EM density maps of both C- and NC-state hNTSR1-G<sub>i1</sub> complexes, a significant density is observed near the outer rims of TMs 6 and 7. The shape of the density would correspond well to cholesterol, and the residues surrounding this pocket are also suitable for cholesterol binding (Extended Data Fig. 5c). Because TMs 6 and 7 change their conformations upon activation, we would expect that this putative cholesterol molecule can only bind to NTSR1 in the active state. These observations are consistent with a previous study suggesting that cholesterol binds to NTSR1 and enhances its stability<sup>77</sup>. However, cholesterol was not added during the protein purification and there was no aromatic residue interacting with the sterol group, which is presumably important for cholesterol binding<sup>78</sup>. It is possible that cholesterol extracted from insect cell membrane was co-purified with hNTSR1. Alternatively, the density may correspond to CHS added to all purification buffers. However, given these uncertainties, we did not include this putative cholesterol or CHS molecule in the final model to avoid potentially misleading the readers.

**Amino acid sequences of the NanoBiT-G protein constructs.**

Coloring denotes LgBiT (red), SmBiT (blue) and 15-amino acid flexible linker (purple).

Gαs-Lg (GNAS-LgBiT)

MGCLGNSKTEDQRNEEKAQREANKKIEKQLQKDKQVYRATHRLLLLGAGESGKSTIVKQMRILHVNGFNG  
EGGEEDPQAARSNSDGEKATKQVQDIKNNLKEAIEETIVAAMSNLGGSGGGGSGGSSSGGVFTLEDFVGDWE  
QTAAYNLDQVLEQGGVSSLLQNLAVSVTPIQRIVRSGENALKIDIHVIIPYEGLSADQMAQIEEVFKVVY  
PVDDHHFKVILPYGTLVIDGVTNMLNYFGRPYEGIAVFDGKKITVTGTLWNGNKIIDERLITPDGSMLF  
RVTINSGSGGGGSGGSSSGGVPPVELANPENQFRVDYILSVMNVPDFDFPPEFYEHAKALWEDEGV  
RAC YERSNEYQLIDCAQYFLDKIDVIKQADYVPSDQDLLRCRVLTSGIFETKFQVDKVNFMFDVGGQRDERR  
KWIQCFNDVTAIIFVAVSSYNMVIREDNQTNRLQEALNLFKSIWNNRWLRTISVILFLNKQDLLAEKVL  
AGKSKIEDYFPEFARYTTPEDATPEPGEDPRVTRAKYFIRDEFRLRISTASGDGRHYCYPHFTCAVDTENI  
RRVFNDCRDIIQRMHLRQYELL

Gαi1-Lg (GNAI1-LgBiT)

MGCTLSAEDKAAVERSKMIDRNLREDGEKAAREVKLLLLGAGESGKSTIVKQMKIIEHAGYSEEECKQYK  
AVVYSNTIQSIIAIIIRAMGRLGGSGGGGSGGSSSGGVFTLEDFVGDWEQTAAYNLDQVLEQGGVSSLLQ  
NLAVSVTPIQRIVRSGENALKIDIHVIIPYEGLSADQMAQIEEVFKVVYPVDDHHFKVILPYGTLVIDGVT  
NMLNYFGRPYEGIAVFDGKKITVTGTLWNGNKIIDERLITPDGSMLFRVTINSGSGGGGSGGSSSGGK  
IDFGDSARADDARQLFVLAGAAEEGFMTAELAGVIKRLWKDSGVQACFNRSREYQLNDSAAYLNDLDRI  
AQPNIPTQQDVLTRVKTTGIVETHFTFKDLHFKMFVGGQRSERKKWIHCFEGVTAIIFCVALS DYDL  
VLAEDEEMNRMHESMKLFDSICNNKWFDTDSIILFLNKKDLFEKIKKSPLTICYPEYAGSNTYEEAAAY  
IQCFEDLNKRKDTKEIYTHFTCATDTKNVQFVFDVAVTDVIIKNNLKDCGLF

Gαo-Lg (GNAO1-LgBiT)

MGCTLSAEERAALERSKAIEKNLKEDGISAAKDVKLLLLGAGESGKSTIVKQMKIIEHEDGFSGEDVKQYK  
PVVYSNTIQSLAAIVRAMDTLGGSGGGGSGGSSSGGVFTLEDFVGDWEQTAAYNLDQVLEQGGVSSLLQ  
NLAVSVTPIQRIVRSGENALKIDIHVIIPYEGLSADQMAQIEEVFKVVYPVDDHHFKVILPYGTLVIDGVT  
NMLNYFGRPYEGIAVFDGKKITVTGTLWNGNKIIDERLITPDGSMLFRVTINSGSGGGGSGGSSSGG  
G IEYGDKERKADAKMVC DVSRMEDTEPFSAE LLSAMMRLWGDSGIQECFNRSREYQLNDSAKYYLDSLDR  
IGAADYQPT EQDILRTRVKTTGIVETHFTFKNLHFRLFDVGGQRSERKKWIHCFEDVTAIIFCVALS  
GYD

QVLHEDETTNRMHESLMLFDSICNNKFFIDTSSIILFLNKKDLFGEKIKKSPLTICFPEYTGPNTRYEDAAA  
YIQAQFESKNRSPNKEIYCHMTCATDTNNIQVVFDAVTDIIANNLRGCGLY

Gα<sub>q</sub>-Lg (GNAQ-LgBiT)

MTLESIMACCLSEEAKEARRINDEIERQLRRDKRDARRELKLLLLGTGESGKSTFIKQMRIIHGSGYSDE  
DKRGFTKLVIYQNI FTAMQAMIRAMDTLGGSGGGSGGSSSSGGVFTLEDFVGDWEQTAAYNLDQVLEQGGV  
SSLLQNLAVSVTPIQRIVRSGENALKIDIHVIIPYEGLSADQMAQIEEVFKVVYPVDDHHFKVILPYGTL  
VIDGVTPNMLNYFGRPYEGIAVFDGKKITVTGTLWNGNKIIDERLITPDGSMLFRVTINSGSGGGGGSGG  
SSSGGKIPYKYEHNKAAHAQLVREVDVEKVS AFENPYVDAIKSLWNDPGIQECYDRRREYQLSDSTKYLLN  
DLDRVADPAYLPTQQDVLVRVPTTGIIEYPFDLQSVIFRMVDVGGQRSERRKWIHC FENVTSIMFLVAL  
SEYDQVLVESDNENRMEESKALFRTIITYPWFQNSSVILFLNKKDLLEEKIMYSHLVDYFPEYDGPQRDA  
QAAREFILKMFVDLNPDSDKIYSHFTCATDTENIRFVFAAVKDTILQLNLKEYNLV

Gα<sub>13</sub>-Lg (GNA13-LgBiT)

MADFLPSRSVLSVCFPGCLLTSGEAEQQRKSKEIDKCLSREKTYVKRLVKILLGAGESGKSTFLKQMRI  
IHGQDFDQRAREEFRPTIYSNVIKGMRVLVDAREKLGGSGGGGGSGSSSSGGVFTLEDFVGDWEQTAAYNL  
DQVLEQGGVSSLLQNLAVSVTPIQRIVRSGENALKIDIHVIIPYEGLSADQMAQIEEVFKVVYPVDDHHF  
KVILPYGTLVIDGVTPNMLNYFGRPYEGIAVFDGKKITVTGTLWNGNKIIDERLITPDGSMLFRVTINSG  
GSGGGGGSGGSSSGGHIPWGDNSNQHGDKMMSFDTRAPMAAQGMVETRVFLQYLPARALWADSGIQNAY  
DRRREFQLGESVKYFLDNLDKLGEPDYIPSQDILLARRPTKGIHEYDFEIKNVPFKMVDVGGQRSERKR  
WFECFDSVTSILFLVSSSEFDQVLMEDRLTNRLTESLNIFETIVNNRVFSNVSIIILFNKTDLLEEKVQI  
VSIKDYFLEFEGDPHCLRDVQKFLVECFRNKRRDQQQKPLYHHFTTAINTENIRLVFRDVKDTILHDNLK  
QLMLQ

Sm-Gγ<sub>2</sub> (C68S) (SmBiT-GNG2 C68S)

The C68S mutation is highlighted in green.

MVTGYRLFEEIILGGSGGGGGSGGSSSSGGASNNTASIAQARKLVEQLKMEANIDRIKVSAAAADLMAYCEAH  
AKEDPLLTVPVASENPFREKKFFSAIL
